# Supplementary material for: Immobilization of phosphotungstate through doping in polypyrrole for supercapacitors
Source: Royal Society of Chemistry journal article supplement (doi:10.1039/c9dt00925f), 2019-01-01
Supplement: c9dt00925f1.pdf [file c9dt00925f1.pdf]

**Supplementary Material (ESI) for Dalton Transactions**  
**This journal is © The Royal Society of Chemistry**

---

## **Immobilization of phosphotungstate through doping in polypyrrole for supercapacitors**

Zhihan Chang, Xiaoguang Sang\*, Yu Song, Xiaoqi Sun, Xiao-Xia Liu\*

## Redox reactions of $\text{PW}_{12}$ :

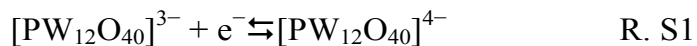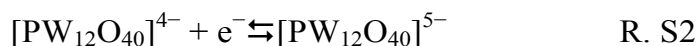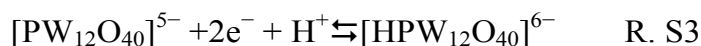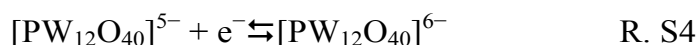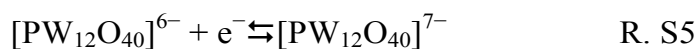

## Calculations

### 1. Calculation for single electrode:

The areal ( $C_a$ ) and specific ( $C_m$ ) capacitance of a single electrode can be calculated from galvanostatic charge/discharge profile by the following equations:

$$C_a = \frac{I \times \Delta t}{S \times \Delta U} \quad \text{equ. S1}$$

Where  $C_a$  is the areal capacitance ( $\text{mF cm}^{-2}$ ),  $I$  ( $\text{mA cm}^{-2}$ ) is the galvanostatic charge/discharge current,  $\Delta t$  (s) is the discharge time,  $S$  ( $\text{cm}^2$ ) is the geometrical area of the electrode,  $\Delta U$  (V) is the charge/discharge potential window.

$$C_m = \frac{I \times \Delta t}{m \times \Delta U} \quad \text{equ. S2}$$

Where  $C_m$  is the specific capacitance ( $\text{F g}^{-1}$ ),  $m$  (g) is the mass of active material on the electrode.

### 2. Charge balance for ASC device:

The charge stored in cathode ( $Q^+$ ) and anode ( $Q^-$ ) should be balanced to maximize the performance of the assembled supercapacitor device by the relationship  $Q^+ = Q^-$ . The charge stored in each electrode depends on the areal capacitance ( $C_a$ ), the potential window ( $\Delta U$ ) and the geometrical area of each electrode ( $S$ ) by the following equation:

$$Q = C_a \times \Delta U \times S \quad \text{equ. S3}$$

Then the following equation can be deduced:

$$C_a^+ \times \Delta U^+ \times S^+ = C_a^- \times \Delta U^- \times S^- \quad \text{equ. S4}$$

### 3. Calculations for ASC device:

The volumetric capacitance of an ASC device can also be calculated from galvanostatic charge/discharge profile by the following equation:

$$C_v = \frac{I \times \Delta t}{V \times U} \quad \text{equ. S5}$$

Where  $C_v$  is the volumetric capacitance ( $\text{F cm}^{-3}$ ),  $I$  is the galvanostatic charge/discharge current,  $\Delta t$  (s) is the discharge time,  $V$  ( $\text{cm}^3$ ) is the volume of the whole ASC device and  $U$  is the operating voltage.

The volumetric capacitance of an ASC device can be calculated from cyclic voltammetry profile by the following equation:

$$C_v^{mv} = \frac{\int i(U) dU}{v \times V \times U} \quad \text{equ. S6}$$

Where  $C_v^{mv}$  is the volumetric capacitance ( $\text{F cm}^{-3}$ ),  $V$  ( $\text{cm}^3$ ) is the volume of the whole ASC device,  $v$  is the scan rate,  $U$  is the potential window in the CV curves, and  $i(U)$  is the voltammetry current on the profile.

The energy density ( $E$ , mWh cm<sup>-3</sup>) and power density ( $P$ , mW cm<sup>-3</sup>) of an ASC device can be calculated by the following equations:

$$E = \frac{1000}{2 \times 3600} C_v U^2 \quad \text{equ. S7}$$

$$P = \frac{3600 \times E}{t} \quad \text{equ. S8}$$

Where  $C_v$  is the volumetric capacitance (F cm<sup>-3</sup>),  $U$  (V) is the operating voltage and  $\Delta t$  (s) is the discharge time.

## Figures

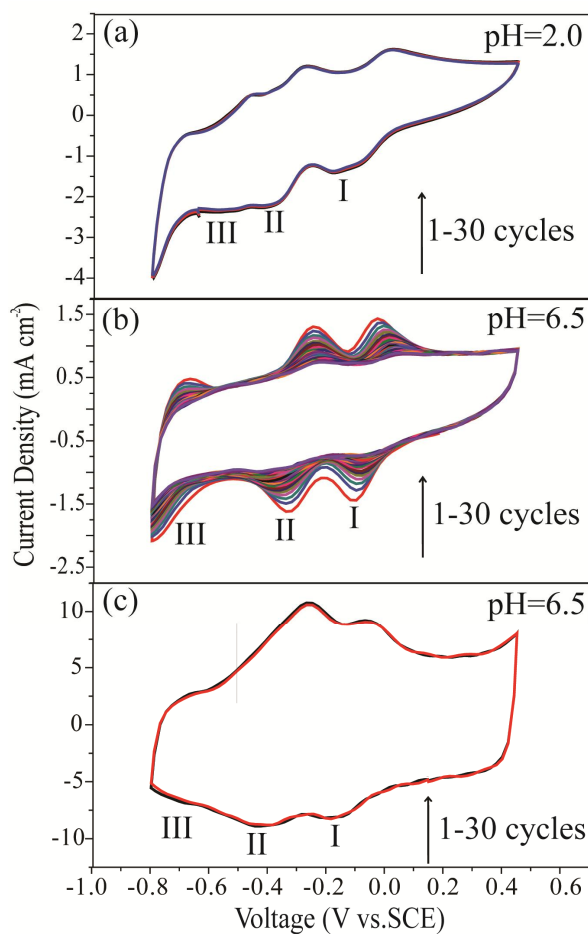

**Fig. S1.** CV profiles of PW<sub>12</sub> anions in neutral solution (a) and acidic solution (b), together with that of ECNT-PPy/5PW<sub>12</sub> in neutral solution (c) at a scan rate of 5 mV s<sup>-1</sup>.

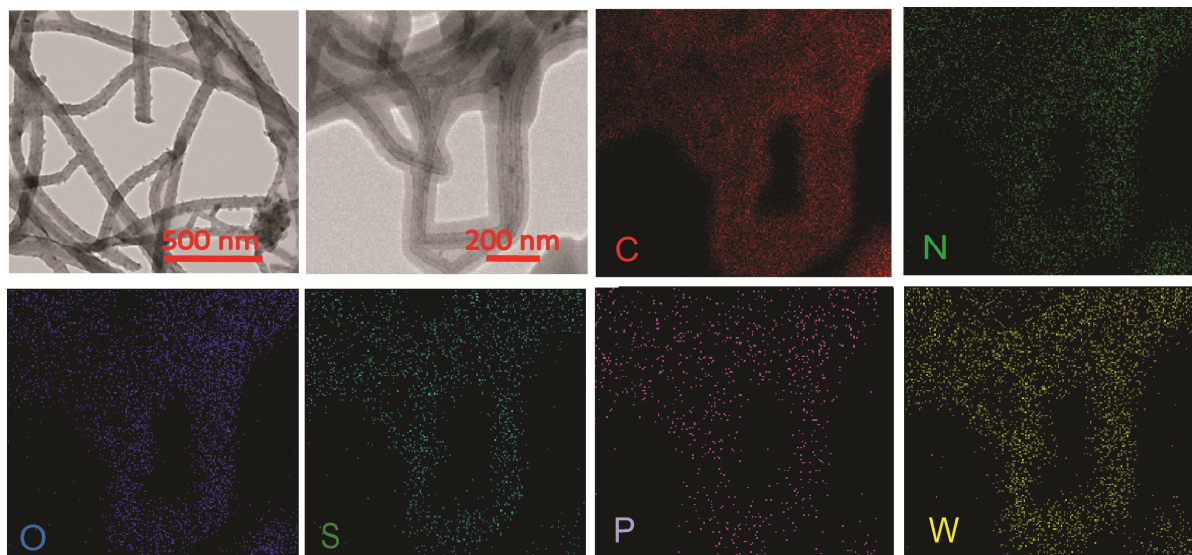

Fig. S2. TEM and elemental mapping images of ECNT-PPy/5PW<sub>12</sub>.

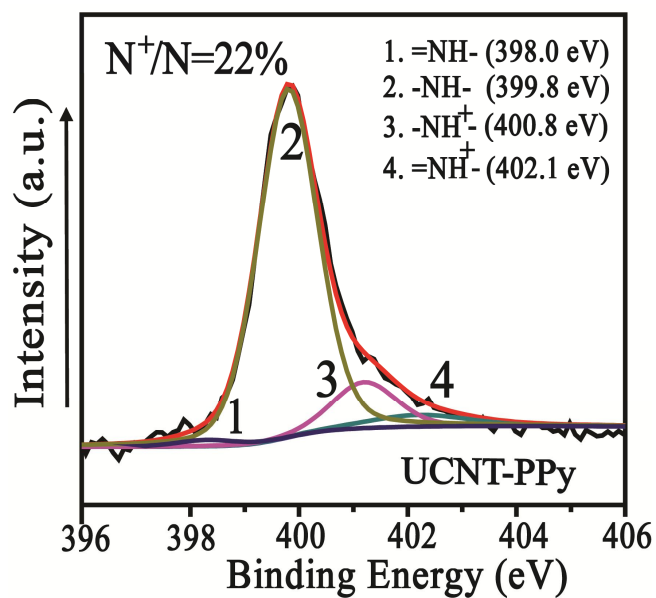

Fig. S3. N 1s XPS core level spectra of UCNT-PPy.

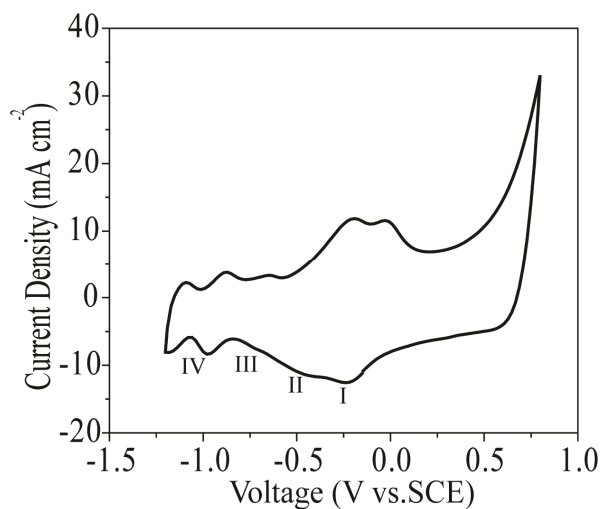

**Fig. S4.** CV profiles of ECNT-PPy/5PW<sub>12</sub> in the potential window of -1.2 to 0.8 V vs. SCE at a scan rate of 5 mV s<sup>-1</sup>.

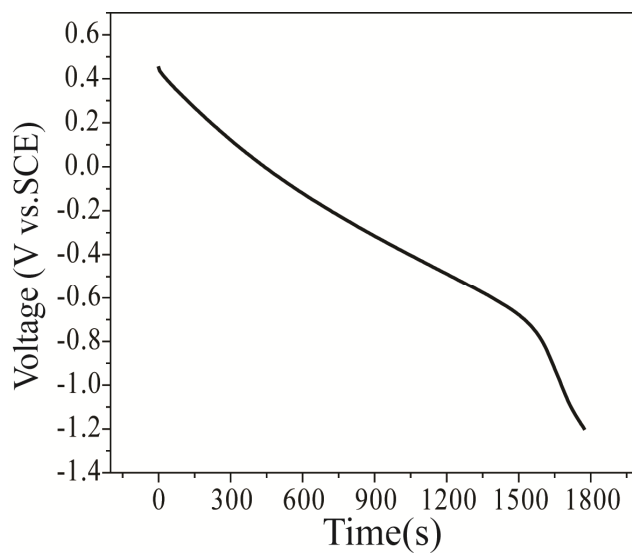

**Fig. S5.** Galvanostatic discharge profile of ECNT-PPy/5PW<sub>12</sub> at a current density of 1 mA cm<sup>-2</sup>.

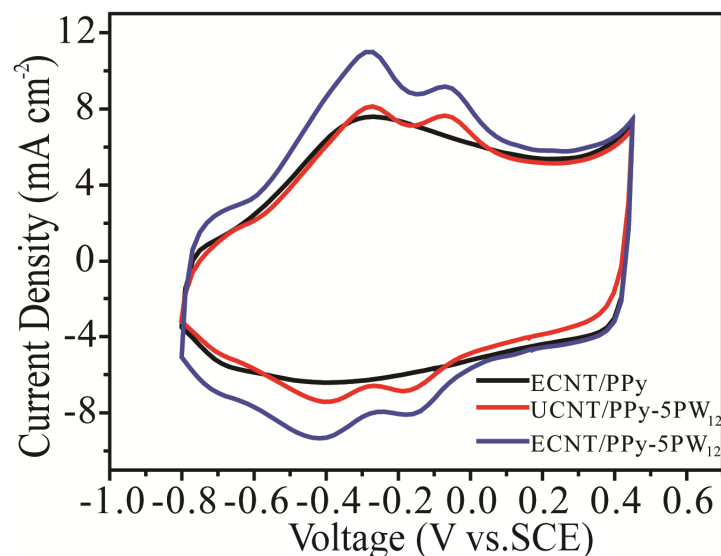

**Fig. S6.** CV profiles at  $5 \text{ mV s}^{-1}$  of ECNT-PPy/5PW<sub>12</sub>, UCNT-PPy/5PW<sub>12</sub> and ECNT/PPy

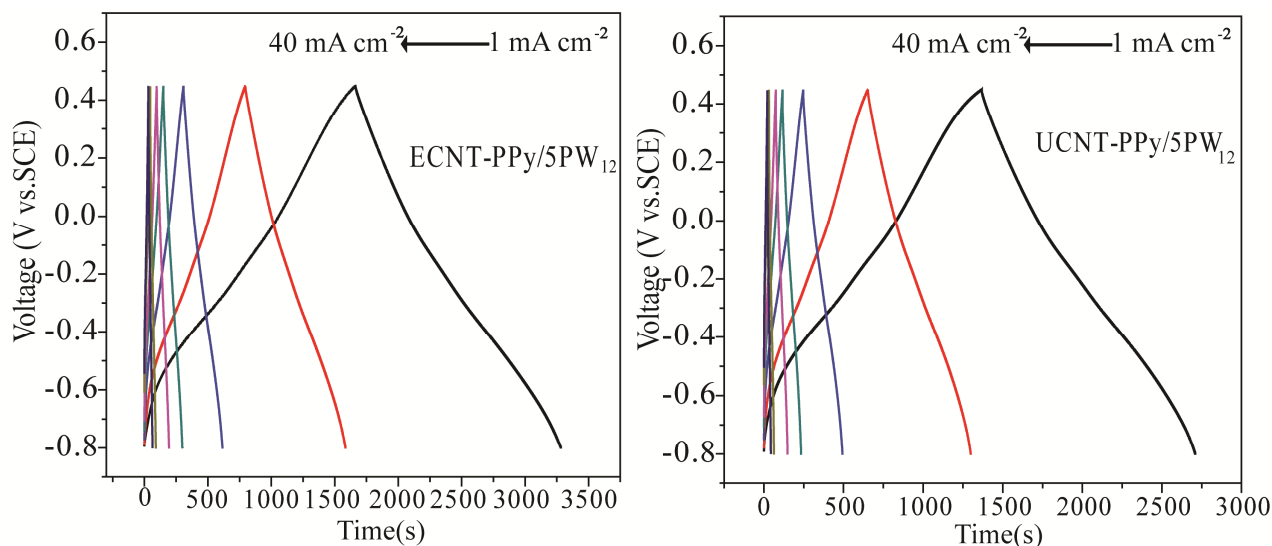

**Fig. S7.** Galvanostatic charge/discharge curves of ECNT-PPy/5PW<sub>12</sub> and UCNT-PPy/5PW<sub>12</sub> at different current densities.

**Table. S1.** Capacitive performances of recently reported PW<sub>12</sub> based composite materials and electrochemically fabricated composites of PPy and CNT film

| Materials                                            | Capacitance                                         | Rate capability                      |
|------------------------------------------------------|-----------------------------------------------------|--------------------------------------|
| Cu-MOF/PPy/PW <sub>12</sub> <sup>1</sup>             | 1.09 F cm <sup>-2</sup> (0.5 mA cm <sup>-2</sup> )  | 68.8% (0.5-2.5 mA cm <sup>-2</sup> ) |
| biochar carbon/PW <sub>12</sub> <sup>2</sup>         | 1.19 F cm <sup>-2</sup> (10 mV s <sup>-1</sup> )    | 70% (10 -200 mV s <sup>-1</sup> )    |
| PW <sub>12</sub> /PPy/rGO <sup>3</sup>               | 295 F g <sup>-1</sup> (1 A g <sup>-1</sup> )        | 55% (1-20 A g <sup>-1</sup> )        |
| Polypyrrole nano-pipes/PW <sub>12</sub> <sup>4</sup> | 434 mF cm <sup>-2</sup> (2 mA cm <sup>-2</sup> )    | 63% (2-20 mA cm <sup>-2</sup> )      |
| CNT/PPy <sup>5</sup>                                 | 637 mF cm <sup>-2</sup> (1 mA cm <sup>-2</sup> )    | 75% (1-40 mA cm <sup>-2</sup> )      |
| CNT/PPy <sup>6</sup>                                 | 280 mF cm <sup>-2</sup> (1.4 mA cm <sup>-2</sup> )  | 43% (1.4 -14 mA cm <sup>-2</sup> )   |
| This work                                            | 1300.0 mF cm <sup>-2</sup> (1 mA cm <sup>-2</sup> ) | 78.6% (1-40 mA cm <sup>-2</sup> )    |

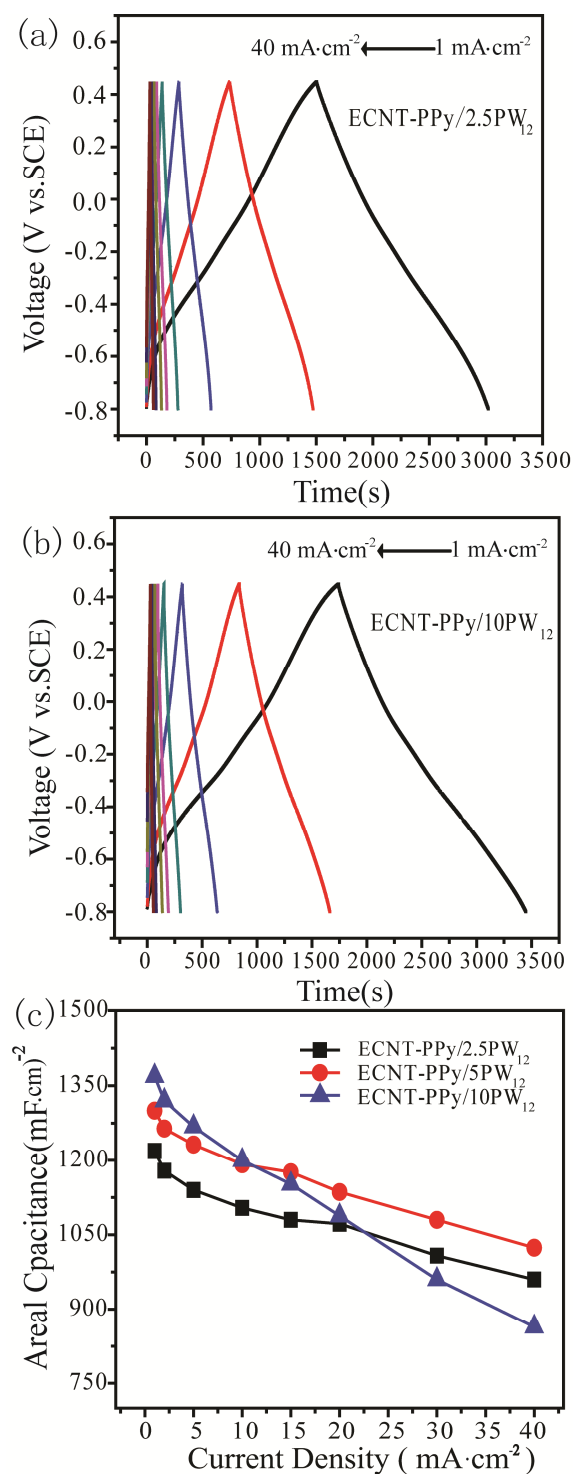

**Fig. S8.** Galvanostatic charge/discharge curves of ECNT-PPy/2.5PW<sub>12</sub> (a) and ECNT-PPy/10PW<sub>12</sub> (b) at different current densities and areal capacitance of ECNT-PPy/2.5PW<sub>12</sub>, ECNT-PPy/10PW<sub>12</sub> and ECNT-PPy/10PW<sub>12</sub> at various current densities ranging from 1 to 40 mA cm<sup>-2</sup> (c).



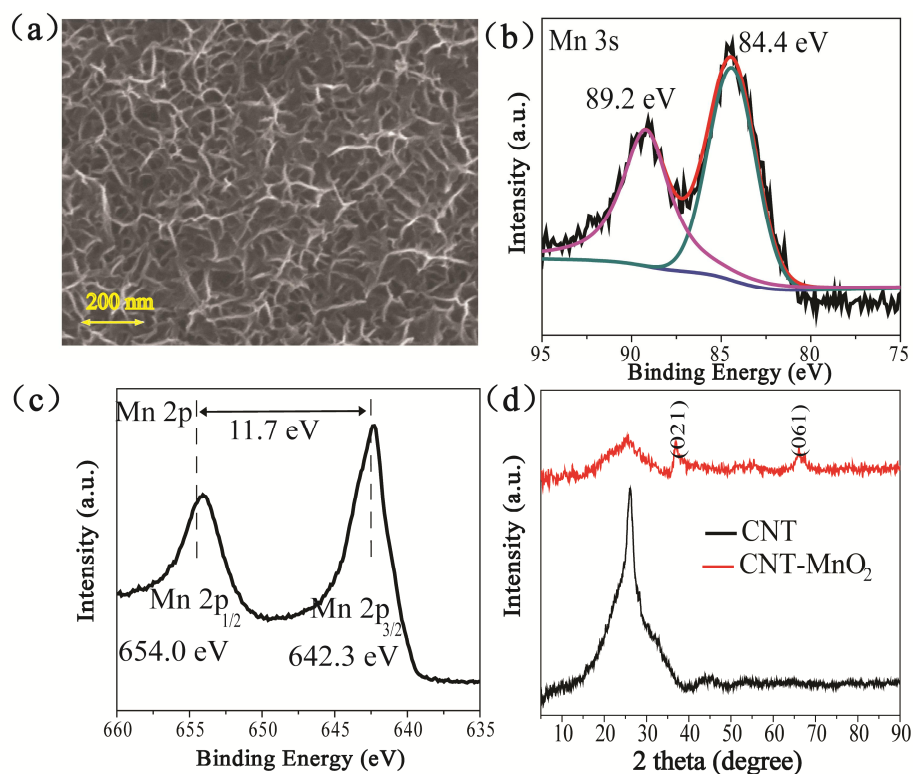

**Fig. S9.** SEM images of CNT-MnO<sub>2</sub> (a), Mn 3s (b) and Mn 2p (c) XPS core level spectra of CNT-MnO<sub>2</sub> and XRD patterns of CNT and CNT-MnO<sub>2</sub> (d).

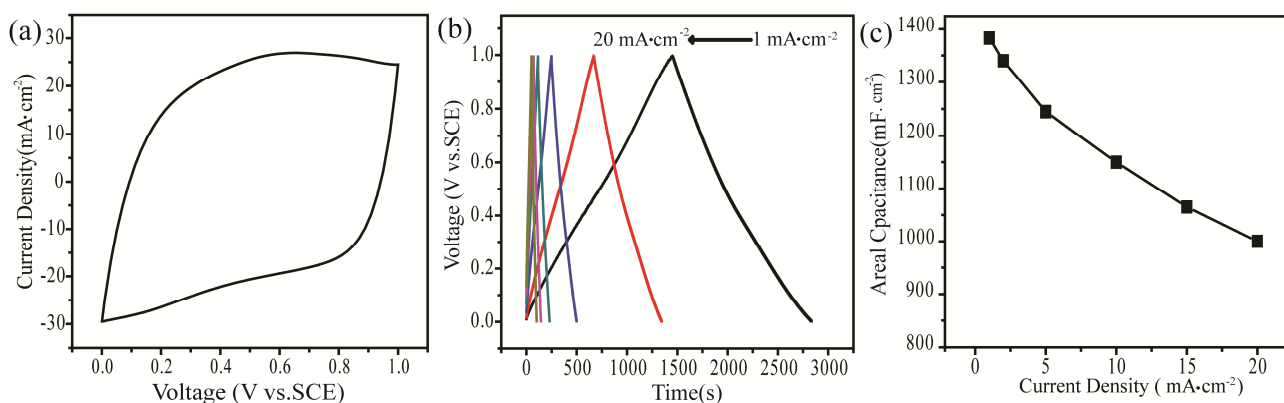

**Fig. S10.** (a) CV profiles of CNT-MnO<sub>2</sub> at 30 mV s<sup>-1</sup>; (b) Galvanostatic charge/discharge curves of CNT/MnO<sub>2</sub> at different current density; (c) Areal capacitance of CNT-MnO<sub>2</sub> at various current densities ranging from 1 to 20 mA cm<sup>-2</sup>.

From SEM images of CNT-MnO<sub>2</sub> shown in Fig. S9a, it could be seen that MnO<sub>2</sub> existed in assembled nanosheets. This could facilitate the penetration of electrode in the active materials for fast faradic reactions. The oxidation state of manganese could be estimated from the spin-energy separation (DE) of Mn 3s signal in XPS spectrum. CNT-MnO<sub>2</sub> displayed a DE of 4.78 eV in its

Mn 3s XPS core level spectrum (Fig. S9b), indicating that the manganese exists in its +4 oxidation state.<sup>7, 8</sup> In the Mn 2p XPS core level spectrum of CNT-MnO<sub>2</sub>, Mn 2p<sub>3/2</sub> and Mn 2p<sub>1/2</sub> signals appeared at 642.3 and 654.0 eV, respectively with a DE of 11.7 eV (Fig. S9c). This was in accordance with previously reported MnO<sub>2</sub>.<sup>9, 10</sup> The crystal structure of MnO<sub>2</sub> was characterized by XRD. The characteristic diffractions in the XRD pattern (Fig. S9d) could be indexed to (021) and (061) planes of the birnessite-type MnO<sub>2</sub> (JCPDS 14-0644)<sup>11</sup>, respectively.

To investigate the electrochemical performances of CNT-MnO<sub>2</sub>, electrochemical measures were conducted in a three-electrode system containing 5 M LiCl electrolyte (Fig. S10). Galvanostatic charge/discharge profiles at different current densities are shown in Fig. S10b. The charge profiles were quite symmetric to the discharge ones, demonstrating a good rate capability for CNT-MnO<sub>2</sub>. The areal capacitances could be calculated through equ. S1-2, based on the galvanostatic charge/discharge experiments. CNT-MnO<sub>2</sub> displayed an areal capacitance of 1380 mF cm<sup>-2</sup> at a current density of 1 mA cm<sup>-2</sup>, and a specific capacitance of 336.58 F g<sup>-1</sup> at 0.24 A g<sup>-1</sup>, 60% of its capacitance can be retained when the current density increases 20 times to 20 mA cm<sup>-2</sup> (Fig. S10c).

## References

1. H.-N. Wang, M. Zhang, A. -M. Zhang, F.-C. Shen, X.-K. Wang, S.-N. Sun, Y.-J. Chen and Y.-Q. Lan, *ACS Applied Materials & Interfaces*, 2018, **10**, 32265-32270.
2. M. Genovese and K. Lian, *Journal of Materials Chemistry A*, 2017, **5**, 3939-3947.
3. Y. Chen, M. Han, Y. Tang, J. Bao, S. Li, Y. Lan and Z. Dai, *Chemical Communications*, 2015, **51**, 12377-12380.
4. D. P. Dubal, B. Ballesteros, A. A. Mohite and P. Gómez-Romero, *ChemSusChem*, 2016, **10**, 731-737.
5. Q. Tang, M. Chen, C. Yang, W. Wang, H. Bao and G. Wang, *ACS Applied Materials & Interfaces*, 2015, **7**, 15303-15313.
6. Y. Chen, L. Du, P. Yang, P. Sun, X. Yu and W. Mai, *Journal of Power Sources*, 2015, **287**, 68-74.
7. L. Bao and X. Li, *Advanced Materials*, 2012, **24**, 3246-3252.
8. L. Du, P. Yang, X. Yu, P. Liu, J. Song and W. Mai, *Journal of Materials Chemistry A*, 2014, **2**, 17561-17567.
9. B. Wei, L. Wang, Q. Miao, Y. Yuan, P. Dong, R. Vajtai and W. Fei, *Carbon*, 2015, **85**, 249-260.
10. Z. Lei, J. Zhang and X. -S. Zhao, *Journal of Materials Chemistry*, 2012, **22**, 153-160.
11. S. Chou, F. Cheng and J. Chen, *Journal of Power Sources*, 2006, **162**, 727-734.
